# Supplementary material for: Nature Inspired Manganese(III)-Calcium Complexes: Towards Synthetic Models for the WOC of PSII
Source: MDPI journal article supplement (doi:10.3390/chemistry5020049), 2023-03-23

ESI for:

# Nature inspired manganese(III)-calcium complexes: towards synthetic models for the WOC of PSII

Joaquin Bonelli Blasco,<sup>1</sup> Sara Mauri Querol,<sup>1</sup> Kevin Consuegra Naranjo<sup>1</sup> and E. Carolina Sañudo <sup>1</sup>\*

<sup>1</sup> Departament de Química Inorgànica i Orgànica, Facultat de Química, Universitat de Barcelona, C/Martí i Franqués 1-11, 08028 Barcelona, Spain

<sup>2</sup> IN2UB Institut de Nanociència i Nanotecnologia, Universitat de Barcelona, C/Martí i Franqués 1-11, 08028 Barcelona, Spain

\* Correspondence: esanudo@ub.edu

Contents:

Table S1. Crystallographic and data collection parameters for complexes **1** and **2**.

Table S2. Bond Valence sum calculations for complexes **1** and **2**.

Figure S1. XPS spectrum for complex **1**.

Figure S2. XPS spectrum for complex **2**.

Table S1. Crystallographic and data collection parameters for complexes **1** and **2**.

|                       | Complex 1·1MeCN·2H <sub>2</sub> O   | Complex 2·18MeOH·4H <sub>2</sub> O | Complex 3                     |
|-----------------------|-------------------------------------|------------------------------------|-------------------------------|
| CSD                   | 2245032                             | 2245034                            | 2245033                       |
| T (K)                 | 100                                 | 100                                | 118                           |
| Wavelength (Å)        | 0.71073                             | 0.71073                            | 0.71073                       |
| System                | Trigonal                            | Trigonal                           | Orthorhombic                  |
| Space group           | R3-                                 | P3-                                | Pbca                          |
| Unit cell a, b, c (Å) | 24.6538(12), 24.6538(12), 47.334(3) | 19.814(2), 19.814(2), 14.978(2)    | 6.324(3), 21.172(3) 26.320(4) |
| Unit cell α, β, γ (°) | 90, 90, 120                         | 90, 90, 120                        | 90, 90, 90                    |
| R1, wR2               | 0.096, 0.26                         | 0.063, 0.17                        | 0.070, 0.183                  |

Table S2. Bond Valence sum calculations for complexes **1** and **2**.

| <b>Complex 1</b> |                 |                 |               |
|------------------|-----------------|-----------------|---------------|
|                  | <b>Mn(II)</b>   | <b>Mn(III)</b>  | <b>Mn(IV)</b> |
| Mn1              | 3.33967         | <b>3.054704</b> | 3.206986      |
| disorder 1       |                 |                 |               |
| Mn2              | 2.943517        | <b>2.692354</b> | 2.826572      |
| disorder 2       |                 |                 |               |
| Mn2              | 3.839489        | <b>3.511875</b> | 3.686947      |
| AVERAGE          |                 | <b>3.10211</b>  |               |
| Ca7              | <b>2.113881</b> |                 |               |
| O2               | 1.281149        | <b>MeO-</b>     |               |
| O1               | 1.758343        | <b>O2-</b>      |               |
| <b>Complex 2</b> |                 |                 |               |
|                  | <b>Mn(II)</b>   | <b>Mn(III)</b>  | <b>Mn(IV)</b> |
| Mn1              | 3.07042         | <b>2.808428</b> | 2.948433      |
| Mn2              | 3.51897         | <b>3.218705</b> | 3.379162      |
| Mn3              | 3.839489        | <b>3.511875</b> | 3.686947      |
| Ca4              | <b>2.279328</b> |                 |               |
| O2               | 2.095931        | <b>O2-</b>      |               |
| O1               | 1.133629        | <b>OH</b>       |               |
| O3               | 1.620074        | <b>MeO-</b>     |               |
| O4               | 1.874023        | <b>O2-</b>      |               |
| O5               | 1.657655        | <b>MeO-</b>     |               |

Figure S1. XPS spectrum for complex 1.

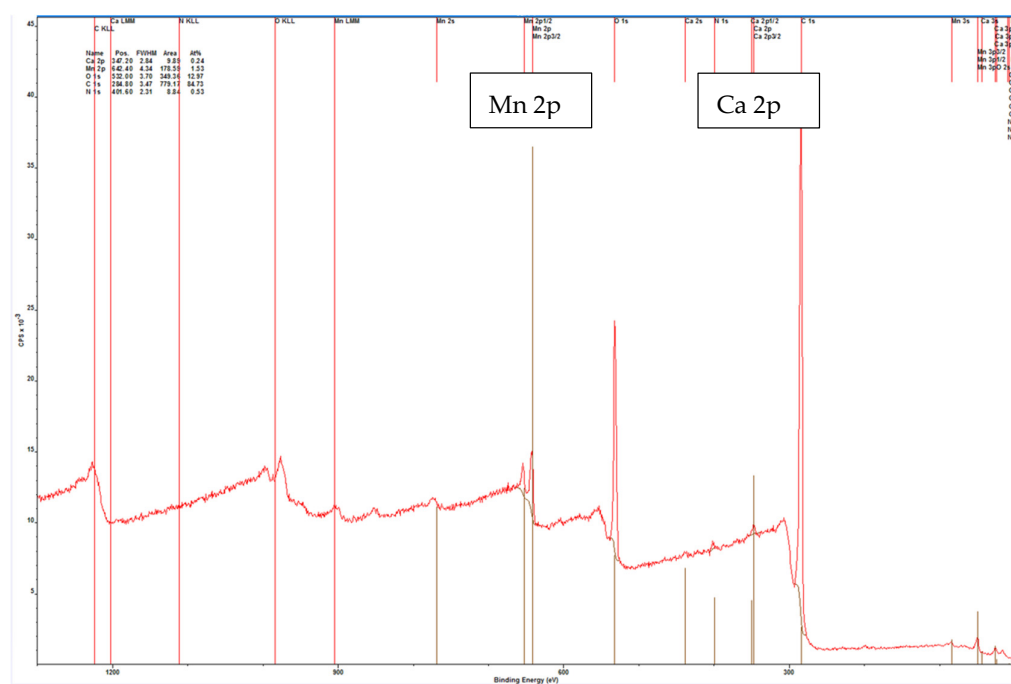

Figure S2. XPS spectrum for complex 2.

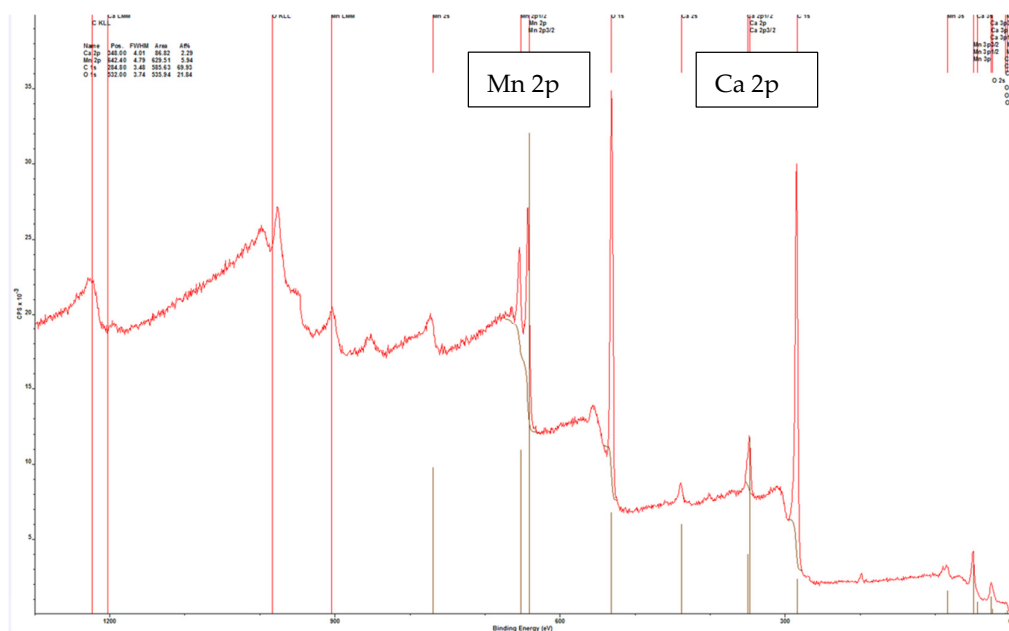

Supplement: s1 [file s1]
